# Supplementary material for: A facile Pt catalyst regeneration process significantly improves the catalytic activity of Pt–organic composites for the O2 reduction reaction
Source: Royal Society of Chemistry journal article supplement (doi:10.1039/c5cc03530a), 2015-01-01
Supplement: c5cc03530a1.pdf [file c5cc03530a1.pdf]

## Electronic Supplementary Information

### **A facile Pt catalyst regeneration process significantly improves the catalytic activity of Pt-organic composites for the O<sub>2</sub> reduction reaction**

*Jing-Fang Huang\* and Wen-Yu Chen*

Department of Chemistry, National Chung Hsing University, Taichung 402, Taiwan,  
R.O.C.

\*Corresponding Author.

E-mail: [jfh@dragon.nchu.edu.tw](mailto:jfh@dragon.nchu.edu.tw)

#### **Experimental Section**

##### **Chemicals.**

K<sub>2</sub>PtCl<sub>4</sub> (99.9%, Alfa), Cu(NO<sub>3</sub>)<sub>2</sub> (99.7%, JT-Baker), NaClO<sub>4</sub> (JT-Baker), H<sub>2</sub>SO<sub>4</sub> (Aldrich), and Nafion (NF, 5%) perfluorinated resin in a mixture of lower aliphatic alcohols and water (Aldrich) were used “as is.”

##### **Fabrication of nPt-embedded Nafion (NF(Pt<sub>nano</sub>)) composites.**

In our previous study,<sup>13, 14</sup> an EC' catalytic process, Cu<sup>+</sup>-mediated Pt reduction (CMPR), was successfully used to incorporate monodisperse nPts in the NF as a non-carbon support. In this process, the accumulated Cu<sup>+</sup> ions resulting from the reduction of Cu<sup>2+</sup> ions in the cathodic potential sweeping served as a movable mediator in the NF. The Cu<sup>+</sup> ions were chemically reoxidized to Cu<sup>2+</sup> ions by PtCl<sub>4</sub><sup>-</sup> at the interface between the NF and PtCl<sub>4</sub><sup>-</sup> solution (Scheme 1). During multiple-scan cyclic voltammetry (MSCV),

monodisperse nPts repeatedly formed in the NF and an NF(Pt<sub>nano</sub>) composite was fabricated by this process.

The electrochemical experiments were accomplished with a CHI 660C potentiostat/galvanostat and a three-electrode electrochemical cell. Ag/AgCl (3.0 M NaCl) and a platinum wire were used as counter electrodes. All potentials in this study were referenced to the reversible hydrogen electrode (RHE), which was calibrated with H<sub>2</sub> oxidation/evolution on a Pt polycrystalline RDE electrode. A GC electrode (BAS, 3.0 mm diameter) or a GC RDE (Pine Instruments, 5.0 mm diameter) was used as a substrate electrode for both NF and NF(Pt<sub>nano</sub>) composite. The NF(Pt<sub>nano</sub>)-modified GC electrode (NF(Pt<sub>nano</sub>)@GCE) was fabricated by CMPR described in our previous studies.<sup>13, 14</sup> Briefly, a GC electrode was successively polished with 1.0, 0.3, and 0.05 μm alumina powder cloth (Buchler), followed by sonication in deionized water (specific resistivity = 18.2 MΩ·cm<sup>-1</sup>) and dried before use. Then, a 5% NF coating solution (4.0–9.0 μL) was spin-coated onto the GC electrode at a spin rate of 3000 rpm. An NF@GC electrode was obtained after approximately 3 min of spinning to allow the solvent to evaporate. The NF(Pt<sub>nano</sub>) composite was obtained by MSCV between 0.7 V and 0.02 V vs. Ag/AgCl (potential range for Cu<sup>2+</sup>/Cu<sup>+</sup>) in 0.1 M NaClO<sub>4</sub> solution containing 0.1 mM PtCl<sub>4</sub><sup>2-</sup> and 0.1 mM Cu<sup>2+</sup>. The scan rate was 0.05 V·s<sup>-1</sup> at 28 °C. The Pt loading was also controlled by the duration of the sweep cycles in CV. The mass of Pt was directly evaluated from the reduction charge of Cu<sup>2+</sup> (the production of 1 equiv. Pt was required to consume two equiv. Cu<sup>+</sup>) or confirmed by inductively coupled plasma-optical emission spectroscopy (ICP-OES). The microstructure of NF(Pt<sub>nano</sub>) composites was observed with a JEOL

JSM-6700F field-emission scanning electron microscope (FE-SEM) and a JEOL JEM-1400 transmission electron microscope (TEM). The TEM samples were prepared by using an NF-deposited Ti grid (NF@Ti) as the working electrode. The NF(Pt<sub>nano</sub>) composite was formed on a Ti TEM grid by the same procedure on the GC substrate.

### **Electrodissolution of nPts.**

An NF(Pt<sub>nano</sub>)@GCE was used as the working electrode for the electrodisolution of nPts. The NF(Pt<sub>nano</sub>)@GCE was dipped in a 0.5 M NaClO<sub>4</sub> aqueous solution containing 0.5 M HCl under stirred. The anodic MSCV potential was scanned in the anodic direction from 0.6 V to 1.3 V (vs. RHE). The scan rate was 0.01 V·s<sup>-1</sup> at 28 °C. The anodic charge used to perform anodic stripping of the nPts from NF(Pt<sub>nano</sub>)@GCEs with a known mass of Pt was evaluated during the anodic MSCV treatment. The oxidation state of the Pt ion was determined in accordance with Faraday's laws of electrolysis.

### **Electrochemical characterization of oxygen reduction reaction (ORR).**

A GC RDE covered with the NF(Pt<sub>nano</sub>) composite was used as the working electrode for ORR measurements. The as-prepared working electrode was electrochemically cleaned using a cycling potential between 0.0 and 1.0 V (vs. RHE) using 10 cycles in Ar-purged 0.5 M sulfuric acid. The electrochemical surface areas (ECSA) were determined by measuring the areas (charges) under the hydrogen adsorption/desorption peaks of the CVs (scan rate: 0.2 V·s<sup>-1</sup>) in a 0.5 M sulfuric acid solution. A conversion factor of 0.21 mC·cm<sup>-2</sup> was used to determine the ECSA.<sup>15</sup> ORR experiments were performed in oxygen-saturated 0.1 M HClO<sub>4</sub> aqueous solution.

The solution was purged with oxygen for at least 30 min to ensure oxygen saturation. A three-electrode electrochemical cell was used for the ORR electrochemical experiments. Ag/AgCl and a Pt wire were used as the reference and counter electrodes, respectively; however, all potentials are quoted with respect to a reversible hydrogen electrode (RHE). The scan rate is 0.01 V·s<sup>-1</sup>. The electrode rotation for RDE voltammetry experiments was provided by a Pine Model AFMSR electrode rotator. The kinetic current for ORR is derived from the Koutecký-Levich equation.<sup>15</sup>

$$\frac{1}{j} = \left( \frac{1}{j_k} + \frac{1}{j_D} \right) = \left( \frac{1}{j_k} + \frac{1}{B\omega^{0.5}} \right)$$

where  $j$  is the measured current density;  $j_k$  and  $j_D$  are the kinetic and diffusion current densities, respectively;  $B$  is a constant; and  $\omega$  is the rotation speed. The experimental value of the  $B$  factor, 0.091 mA·s<sup>-0.5</sup>, is close to the calculated value, 0.092 mA·s<sup>-0.5</sup>, for an ideal 4e<sup>-</sup> process. Calculation of the  $B$  factor ( $B = 0.62nFAD_{O_2}^{2/3} \nu^{1/6} C_{O_2}$ ) was based on published values for the diffusion coefficient of O<sub>2</sub> ( $D_{O_2} = 1.93 \times 10^{-5}$  cm<sup>2</sup>·s<sup>-1</sup>), kinetic viscosity of the solution ( $\nu = 1.009 \times 10^{-2}$  cm<sup>2</sup>·s<sup>-1</sup>), concentration of dissolved O<sub>2</sub> in solution ( $C_{O_2} = 1.26 \times 10^{-3}$  mol·L<sup>-1</sup>), Faraday constant ( $F$ ), and the electrode's geometric area ( $A$ ). The specific activity was calculated using ECSA. The mass activity was obtained by dividing the kinetic current on 0.90 V by the Pt mass.

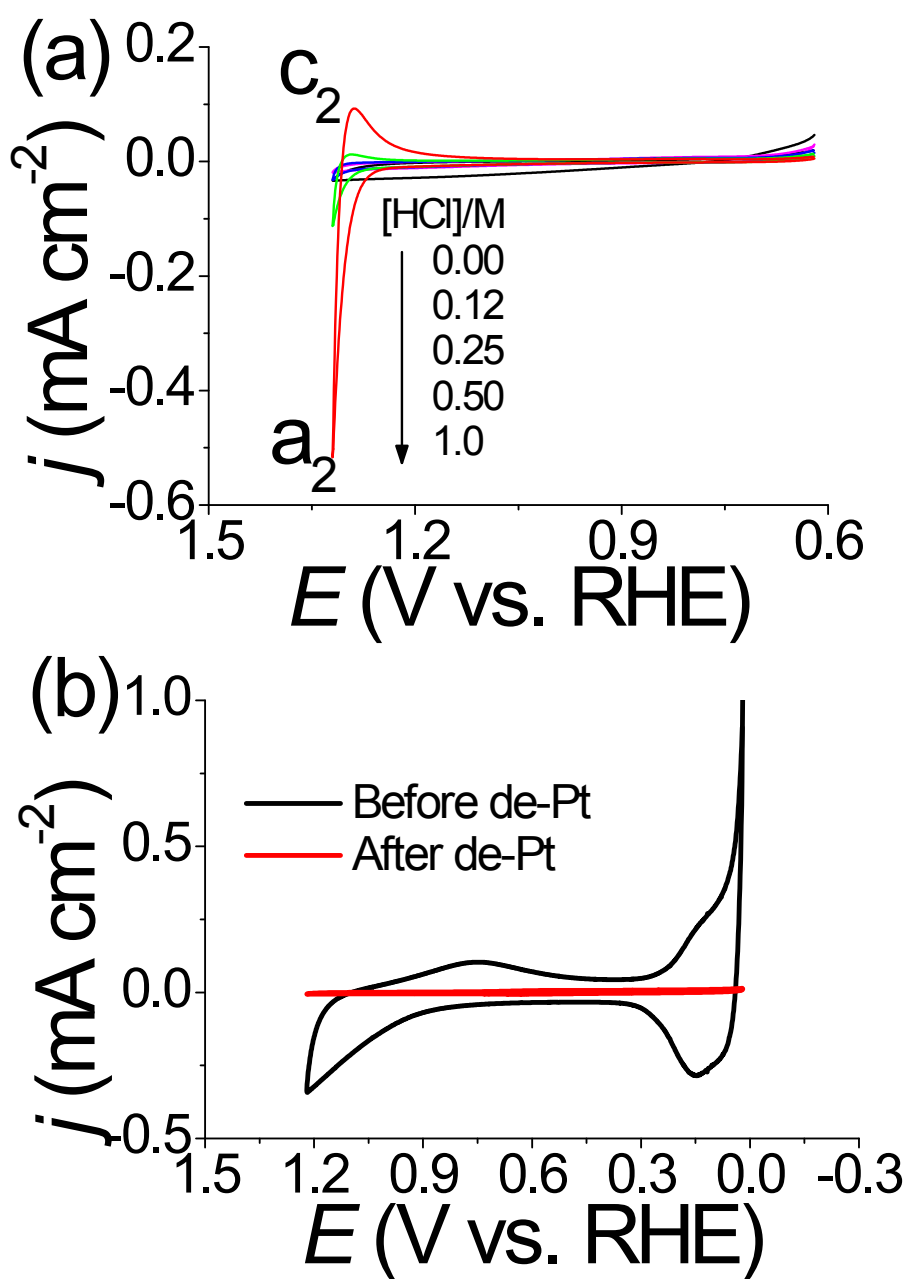

**Fig. S1** (a) CVs of bulk Pt were recorded in 0.5 M NaClO<sub>4</sub> aqueous solutions with various concentration of HCl at a scan rate 0.05 V·s<sup>-1</sup>. (b) CVs of the NF(Pt<sub>nano</sub>)@GCE in 0.5 M H<sub>2</sub>SO<sub>4</sub> recorded before and after de-Pt treatment, respectively, at a scan rate 0.2 V·s<sup>-1</sup>.

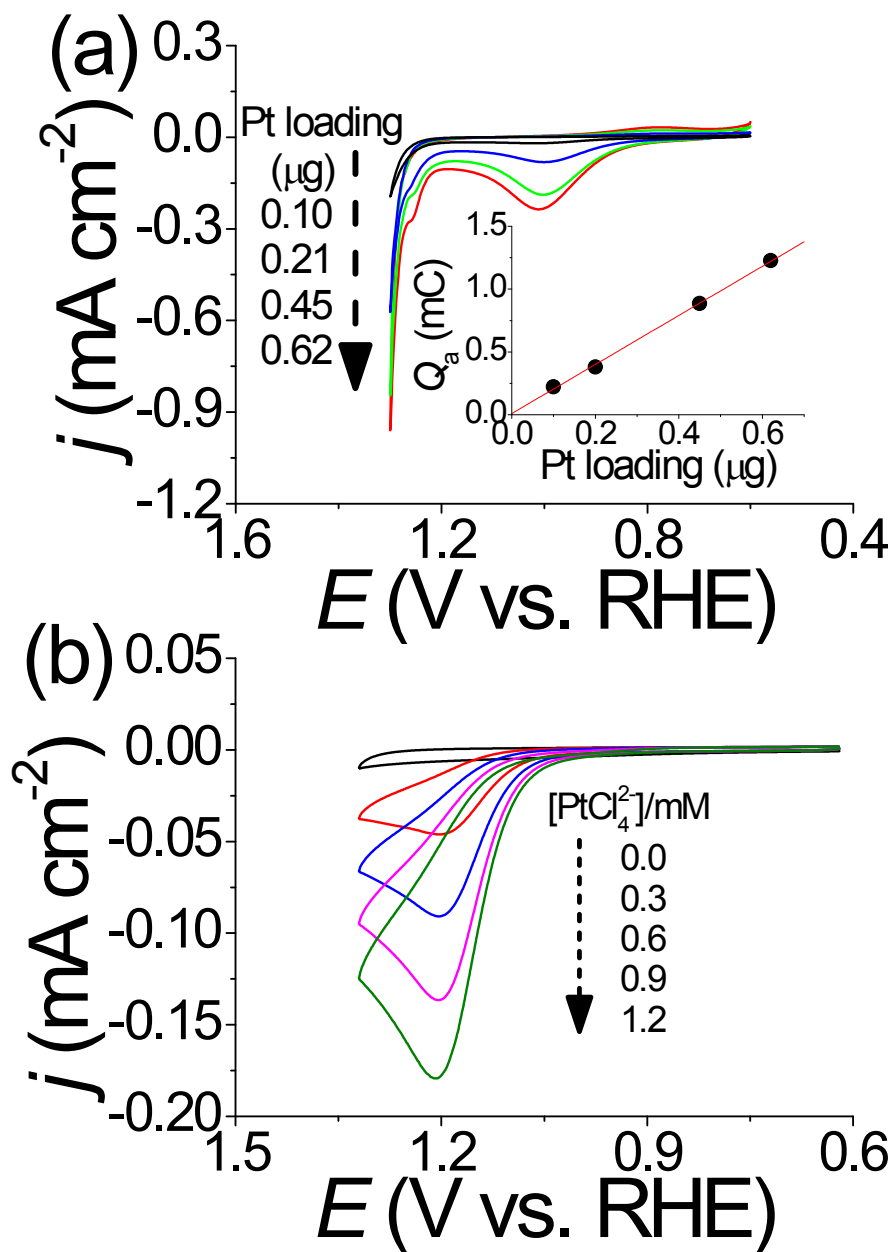

**Fig. S2** (a) CVs of NF(Pt<sub>nano</sub>)@GCEs with known mass of Pt (0.10, 0.21, 0.45, and 0.62 μg) were recorded in 0.5 M NaClO<sub>4</sub> solution containing 0.5 M HCl at a scan rate 0.01 V·s<sup>-1</sup>. The inset is the anodic charge used for anodic stripping of nPts from NF(Pt<sub>nano</sub>)@GCEs vs. the mass of Pt loading. (b) CVs recorded in 0.5 M NaClO<sub>4</sub> solution containing 0.5 M HCl and various concentration of PtCl<sub>4</sub><sup>2-</sup> at a scan rate 0.01 V·s<sup>-1</sup>.

**Table S1** Results for the anodization of NF(Pt<sub>nano</sub>)@GCE

| $W_{\text{Pt}}$<br>( $\mu\text{g}$ ) | $m_{\text{Pt}}$<br>( $\mu\text{mol}$ ) | $Q_{\text{theory}} (n=1)$<br>( $\mu\text{C}$ ) | $Q_{\text{exp}}$<br>( $\mu\text{C}$ ) | n    |
|--------------------------------------|----------------------------------------|------------------------------------------------|---------------------------------------|------|
| 0.12                                 | 0.0006                                 | 60.5                                           | 241                                   | 3.98 |
| 0.19                                 | 0.0010                                 | 96.3                                           | 380                                   | 3.95 |
| 0.41                                 | 0.0021                                 | 205.1                                          | 825                                   | 4.02 |
| 0.52                                 | 0.0027                                 | 256.8                                          | 1030                                  | 4.01 |

$W_{\text{Pt}}$ : the weight of Pt loading in the NF(Pt<sub>nano</sub>)@GCE;  $m_{\text{Pt}}$ : the number of moles of Pt corresponding to this Pt loading;  $Q_{\text{theory}} (n=1)$ : the theoretical charge based on  $W_{\text{Pt}}$  if  $n=1$ ;  $Q_{\text{exp}}$ : the charge passed during the experiment.

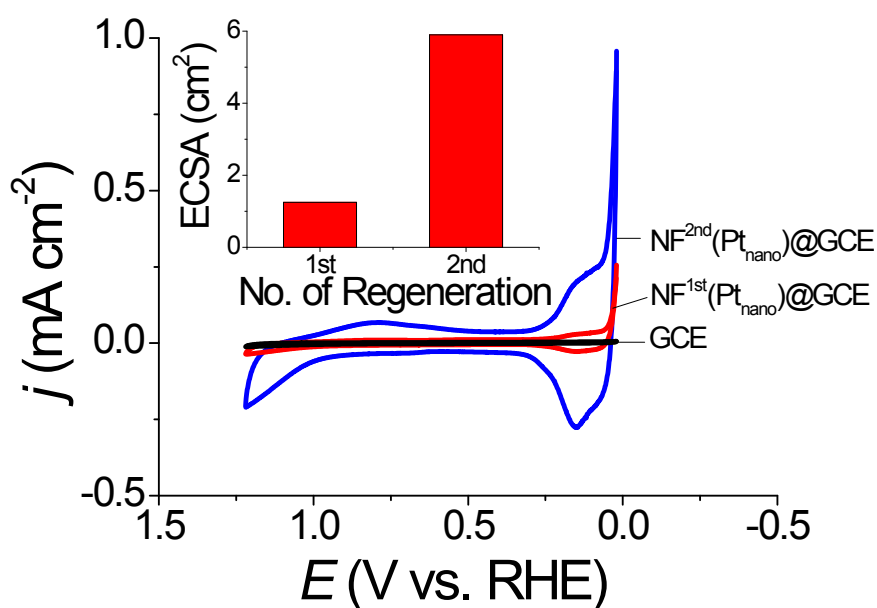

**Fig. S3.** CVs of NF<sup>1st</sup>(Pt<sub>nano</sub>)@GCE (Pt loading: 5  $\mu\text{g}\cdot\text{cm}^{-2}$ ), NF<sup>2nd</sup>(Pt<sub>nano</sub>)@GCE (Pt loading: 5  $\mu\text{g}\cdot\text{cm}^{-2}$ ) and GC were recorded in 0.5 M H<sub>2</sub>SO<sub>4</sub> at a scan rate 0.2 V·s<sup>-1</sup>. Inset: ECSA of NF<sup>1st</sup>(Pt<sub>nano</sub>) and NF<sup>2nd</sup>(Pt<sub>nano</sub>) evaluated from the charge under the voltammetric peaks for hydrogen adsorption or desorption (0.3–0.0 V vs. RHE) using the reported value of 0.21 mC·cm<sup>-2</sup> for a clean Pt surface.

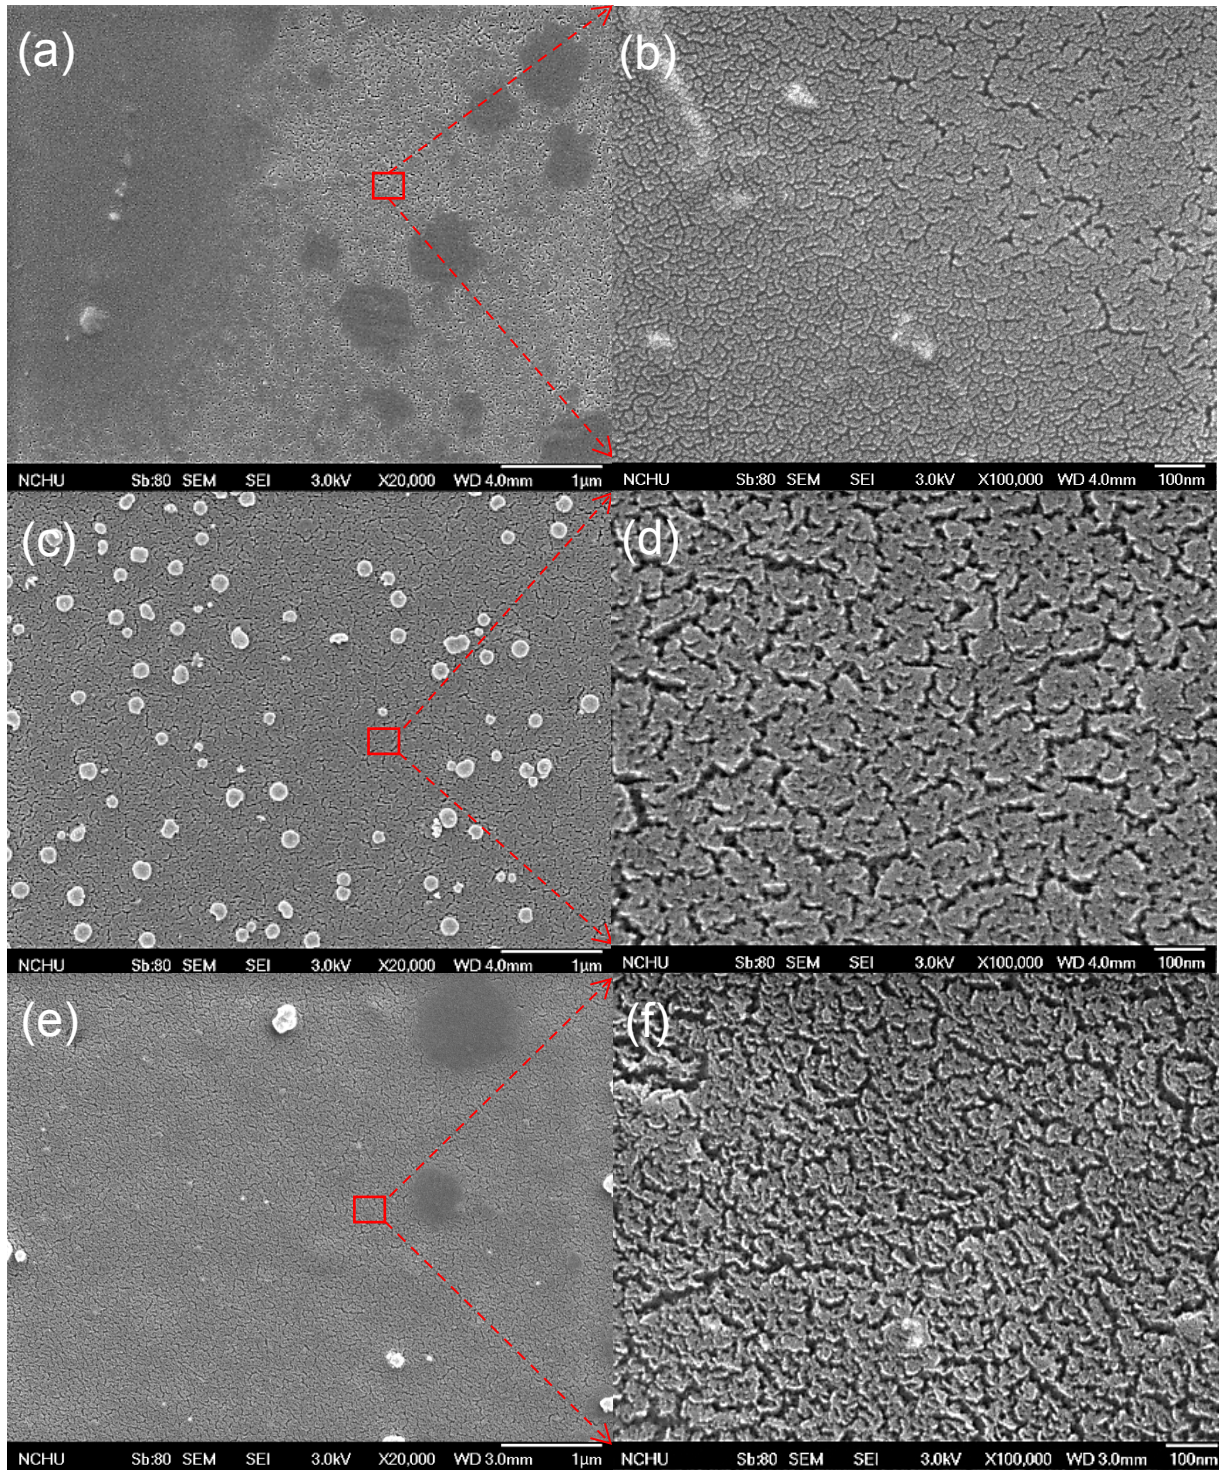

**Fig. S4.** SEM images of (a) and (b) NF, (c) and (d) NF<sup>1st</sup>(Pt<sub>nano</sub>) and (e) and (f) NF<sup>2nd</sup>(Pt<sub>nano</sub>); (a), (c), and (e) were taken at lower magnification ( $\times 20000$ ) and (b), (d), and (f) were taken at higher magnification ( $\times 100000$ ).



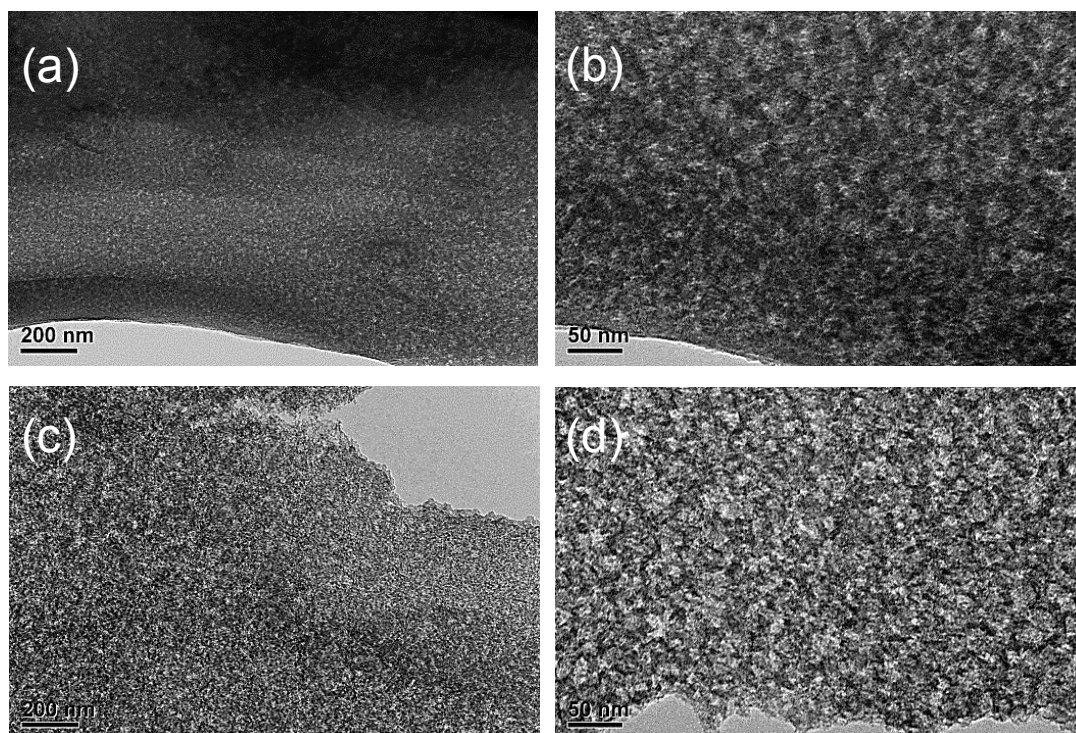

**Fig. S5** TEM images of (a) and b)  $\text{NF}^{1\text{st}}(\text{Pt}_{\text{nano}})$  and (c) and (d)  $\text{NF}^{2\text{nd}}(\text{Pt}_{\text{nano}})$ ; (a) and (c) were taken at lower magnification ( $\times 100000$ ) and (b) and (d) were taken at higher magnification ( $\times 400000$ ).

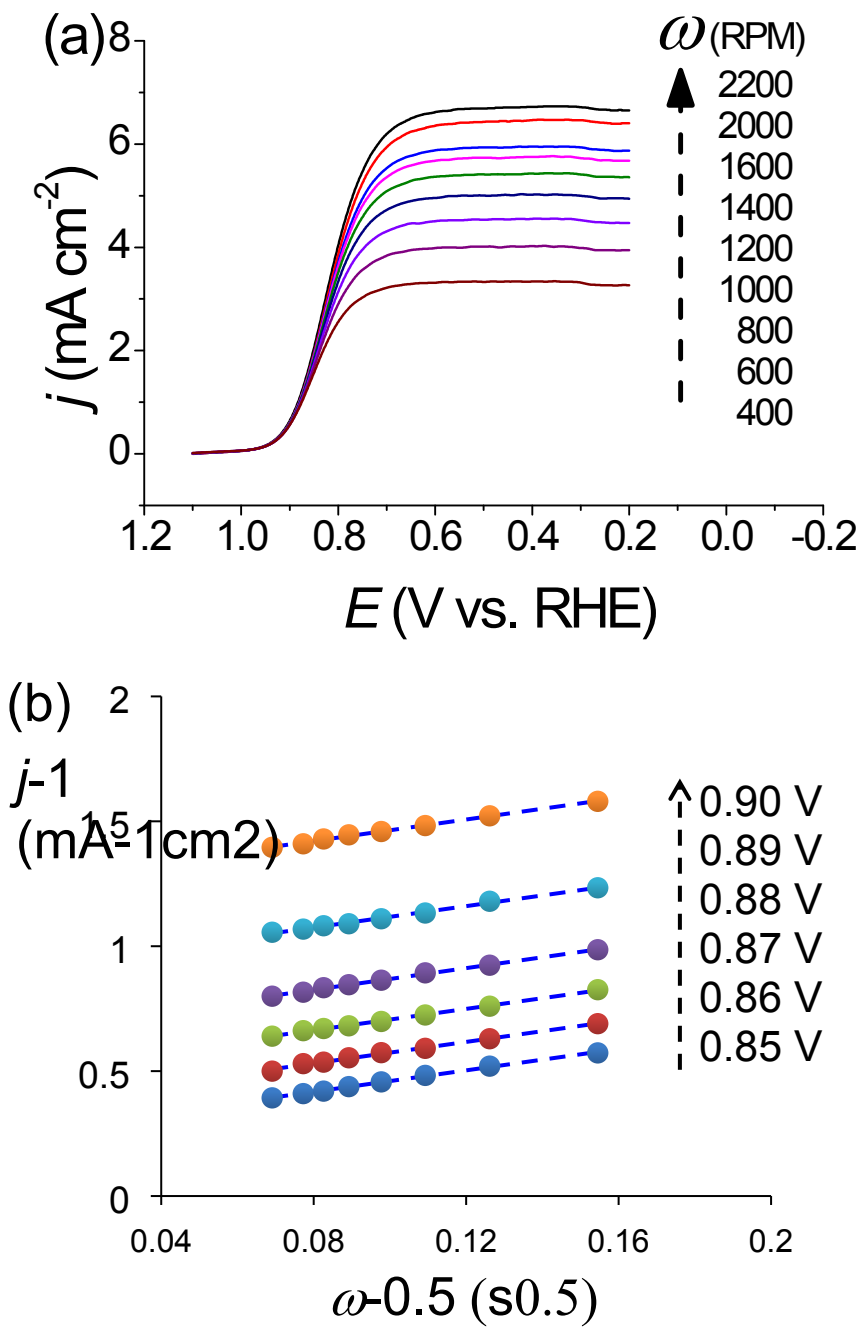

**Fig. S6** (a) ORR polarization curves of the NF<sup>2nd</sup>(Pt<sub>nano</sub>) composite (Pt loading: 5  $\mu\text{g}\cdot\text{cm}^{-2}$ )-modified GC RDE at various rates of rotation at room temperature in O<sub>2</sub>-saturated 0.1 M HClO<sub>4</sub> aqueous solution. The scan rate was 0.01 V·s<sup>-1</sup>. (b) Koutecký-Levich plots at different potentials obtained from the data in (a).
